# Supplementary material for: A 2-chloroethyl ethyl sulfide (2-CEES) gas sensor based on a WO3/graphite nanocomposite with high selectivity and fast response-recovery properties
Source: Royal Society of Chemistry journal article supplement (doi:10.1039/d2ma00621a), 2022-01-01
Supplement: d2ma00621a1.pdf [file d2ma00621a1.pdf]

# Supporting Information

## **A 2-chloroethyl ethyl sulfide (2-CEES) gas sensor based on WO<sub>3</sub>/graphite nanocomposite with high selectivity and fast response-recovery properties**

Chenguang Qiu<sup>a</sup>, Kun Li<sup>a</sup>, Wenlong Yan<sup>a,b</sup>, Yong Fan<sup>b</sup>, Changyue Xia<sup>b</sup>, Chuang Sun<sup>b</sup>, Wei Zeng<sup>a,b</sup> and Siliang Wang<sup>a,b</sup>

<sup>a</sup>EAST CHINA INSTITUTE OF PHOTO-ELECTRONICS, No. 89 Longshan Road, Suzhou 215163, Jiangsu Province, People's Republic of China

<sup>b</sup>Information Materials and Intelligent Sensing Laboratory of Anhui Province, Industry-Education-Research Institute of Advanced Materials and Technology for Integrated Circuits, Anhui University, No. 111 Jiulong Road, Hefei 230601, Anhui Province, People's Republic of China

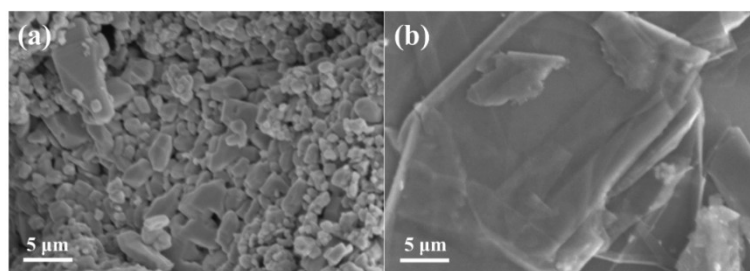

**Figure S1.** The SEM images of (a) WO<sub>3</sub> nanoparticles and (b) graphite.

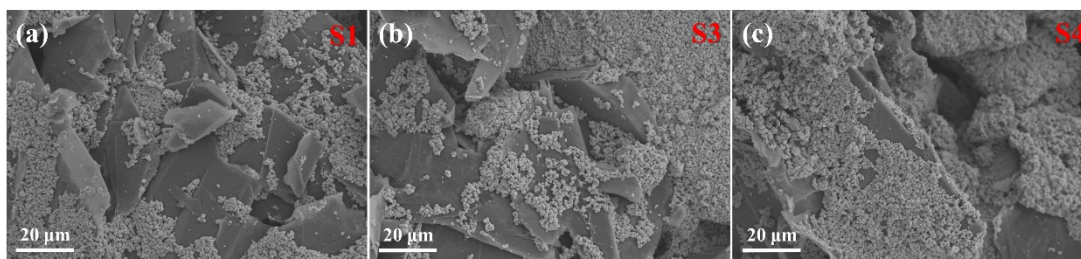

**Figure S2.** The SEM images of (a) S1, (b) S3 and (c) S4.

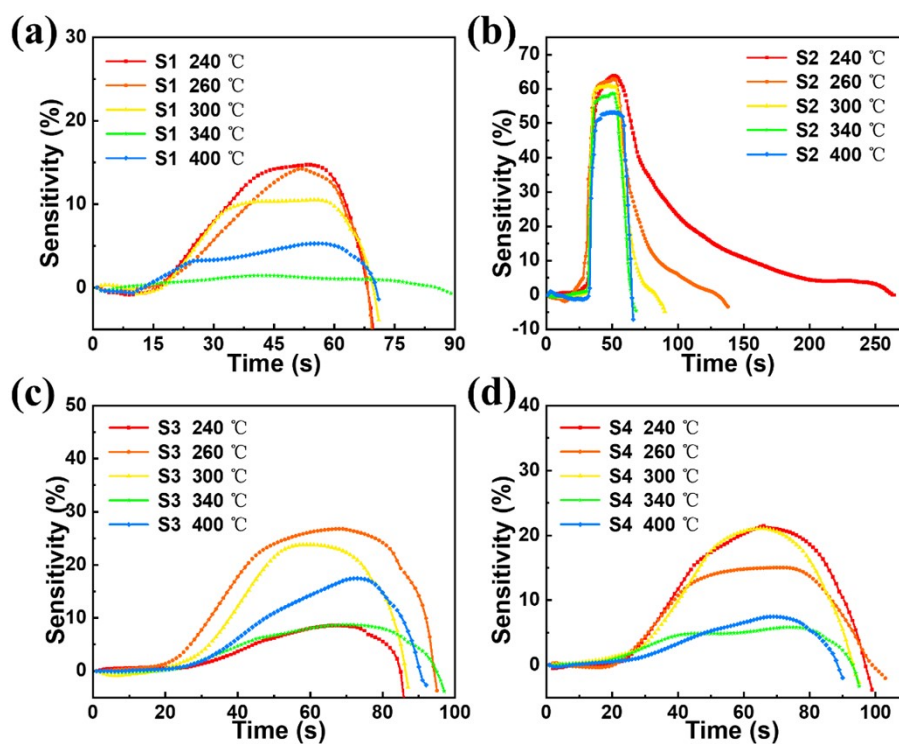

**Figure S3.** Sensing responses of WO<sub>3</sub>/graphite sensors with different mass ratios to 5.70 ppm 2-CEES at different temperatures. (a) S1, (b) S2, (c) S3, (d) S4.

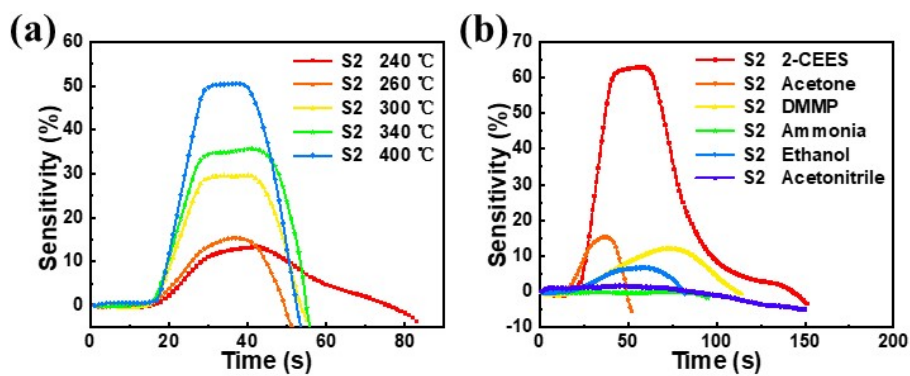

**Figure S4.** The sensing responses of WO<sub>3</sub>/graphite (S2) sensor. (a) The sensing responses of WO<sub>3</sub>/graphite (S2) sensor to 5.70 ppm of acetone at different temperatures. (b) The sensing responses of WO<sub>3</sub>/graphite (S2) sensor to 5.70 ppm of 2-CEES and other gases (acetone, DMMP, ammonia, ethanol, and acetonitrile) at temperature of 260 °C.
